# Supplementary material for: Genetic parameters estimation and genome molecular marker identification for gestation length in pigs
Source: PubMed Central journal article supplement (PMC9849246; doi:10.3389/fgene.2022.1046423), 2023-01-05

A

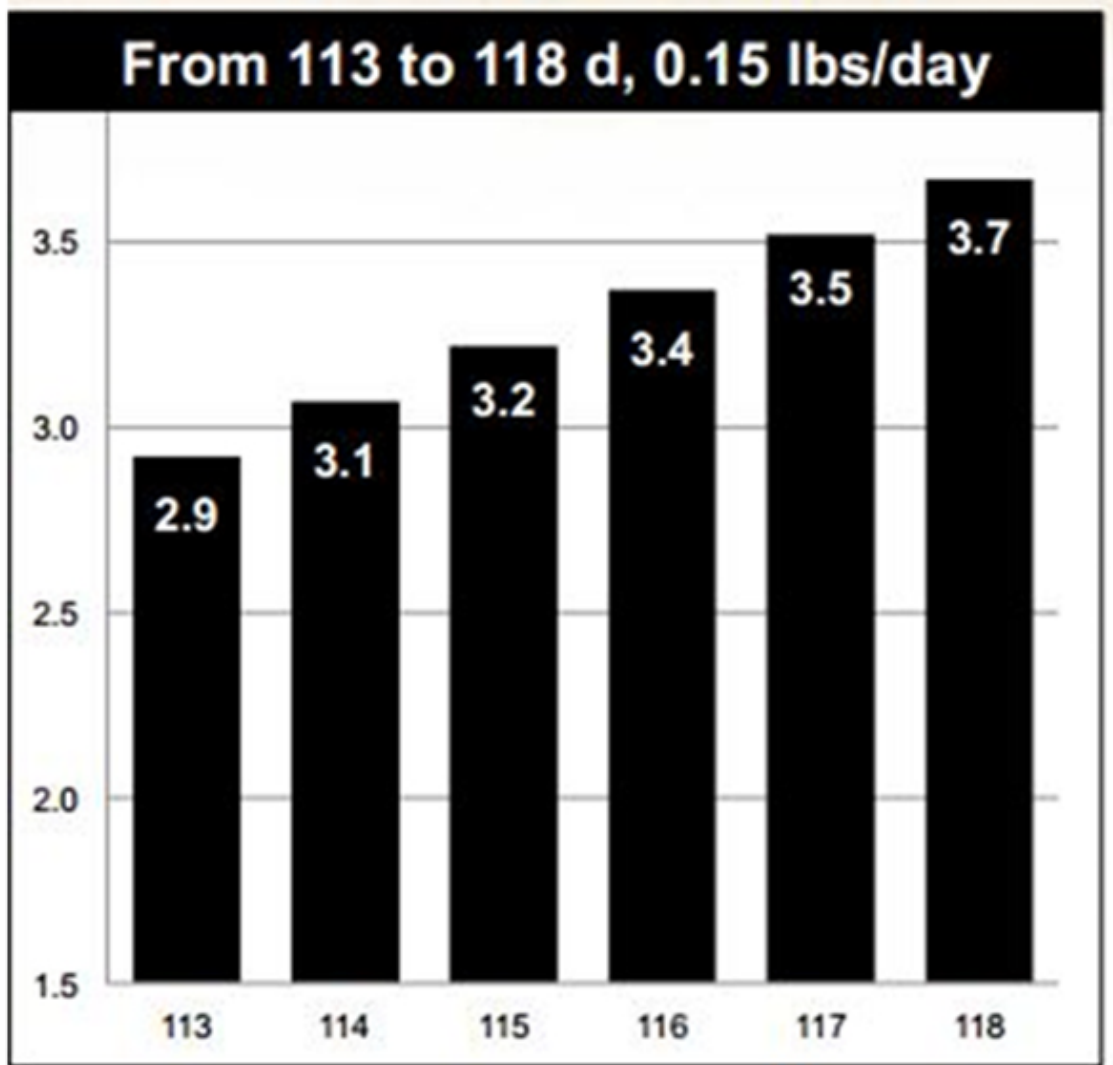

B

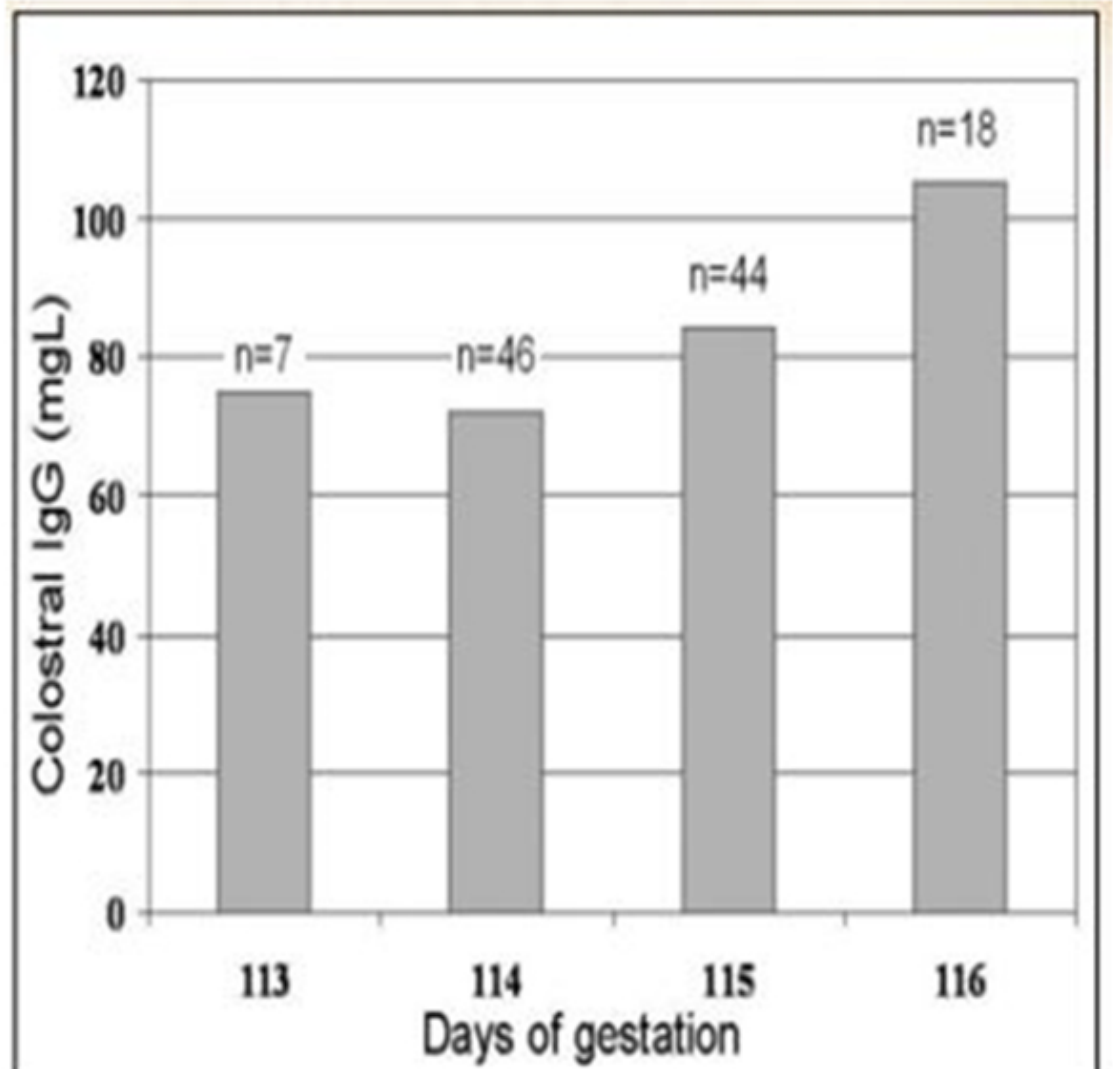

Supplement: Image1.pdf [file Image1.pdf]
